# Supplementary material
Source: publisher figshare collection journal article supplement (https://karger.figshare.com/articles/dataset/_/4038240)
Supplement: Supplementary file 2 [file 1]

## Supplementary Dataset 1

## Modulated microRNA predicted gene targets in PI3K-Akt signaling pathway\*

| MIRNA             | Number of Genes Targeted | Genes                                                                                                                                                              |
|-------------------|--------------------------|--------------------------------------------------------------------------------------------------------------------------------------------------------------------|
| mmu-miR-28-3p     | 2                        | Ywhah, Foxo3                                                                                                                                                       |
| mmu-miR-30c-1-3p  | 3                        | Gsk3b, Gng7, Thbs3                                                                                                                                                 |
| mmu-miR-376c-3p   | 2                        | Ppp2r5a, Itgb8                                                                                                                                                     |
| mmu-miR-135b-5p   | 10                       | Gsk3b, Ptk2, Pik3r2, Fgf11, Creb5, Prlr, Pik3cd, Ppp2r5c, Col5a1, Myc                                                                                              |
| mmu-miR-466b-3p   | 18                       | Mapk1, Pdpk1, Tlrl4, Gsk3b, Pdgfc, Ywhag, Spp1, Itga2, Igf1, Creb1, Phlpp2, Irs1, Pdgfd, Vegfa, Col24a1, Fgf2, Pdgfra, Itgb8                                       |
| mmu-miR-350-3p    | 10                       | Prkaa2, Pik3r3, Creb1, Ywhab, Them4, Ghr, Sos1, Col1a2, Ikbkg, Pdgfra                                                                                              |
| mmu-miR-149-5p    | 7                        | Ywhaz, Pdgfc, Fasl, Phlpp2, Brca1, Crtc2, Pdgfra                                                                                                                   |
| mmu-miR-486-5p    | 3                        | Pik3r1, Pdpk1, Pten                                                                                                                                                |
| mmu-miR-214-3p    | 15                       | Pdpk1,                                                                                                                                                             |
| mmu-miR-27b-5p    | 2                        | Sos2, Pik3cg                                                                                                                                                       |
| mmu-miR-93-3p     | 2                        | Mapk1, Gnb1                                                                                                                                                        |
| mmu-miR-467e-5p   | 1                        | Pdgfd                                                                                                                                                              |
| mmu-miR-7b-5p     | 7                        | Rps6kb1, Ddit4, Il2ra, Chrm1, Col1a2,, Sg1, Pik3cd                                                                                                                 |
| mmu-miR-132-3p    | 8                        | Mapk1, Gnb1, Sos1, Foxo3, Col5a2, Pten, Itgb8, Itga9                                                                                                               |
| mmu-miR-466a-3p   | 22                       | Mapk1, Pik3r1, Pdpk1, Gsk3b, Itga2, Fgf4, Irs1, Pdgfd, Vegfa, Gng2, Prkaa1, Chuk, Fgf2, Itgb1, Bcl2l11, Pdgfra, Pten, Pik3cd, Itgb8, Col5a1, Pkn2, Kit             |
| mmu-miR-7a-1-3p   | 22                       | Pik3r1, Itga6, Thbs1, Igf1, Phlpp1, Ccne2, Creb1, Gng2, Casp9, Thbs2, Fgf13, Kras, Angpt1, Sos1, Pik3cb, Itgav, Ppp2r3c, Pdgfra, Pten, Myb, Met, Cdk2              |
| mmu-miR-381-3p    | 19                       | Flt1, Pdpk1, Gsk3b, Pdgfc, Rps6kb1, Ppp2r2a, Thbs1, Lpar6, Ppp2r5c, Vegfa, Fgf13, Col1a2, Col4a1, Fgf2, Col11a1, Pten, Atf2, Met, Ppp2r5c                          |
| mmu-miR-22-5p     | 3                        | Map2k1, Il2ra, Ppp2r5c                                                                                                                                             |
| mmu-let-7f-5p     | 20                       | Prkaa2, Tsc1, Bcl2l1, Col3a1, Thbs1, Insr, Ngf, Fgf11, Col1a1, Col27a1, Chrm1, Prlr, Ghr, Nras, Col5a2, Osmr, Col24a1, Col1a2, Il6, Rps6kb2                        |
| mmu-miR-423-5p    | 3                        | Cdkn1a, Thbs3, Angpt4                                                                                                                                              |
| mmu-miR-375-3p    | 8                        | Tsc1, Lpar4, Pdpk1, Kdr, Ppp2r2a, Prlr, Itga8, Pik3ca,                                                                                                             |
| mmu-miR-351-5p    | 6                        | Prkaa2, Lpar4, Il7r, Ppp2ca, Mcl1, Itga9                                                                                                                           |
| mmu-miR-193b-3p   | 6                        | Sos2, Ywhaz, Fgf1, Ppp2ca, Pten, Kit                                                                                                                               |
| mmu-miR-18a-3p    | 2                        | Creb1, Efnal                                                                                                                                                       |
| mmu-miR-191-3p    | 1                        | Bcl2l1                                                                                                                                                             |
| mmu-miR-17-3p     | 8                        | Tsc1, Eif4e2, Ywhag, Ppp2ca, Ywhaq, Bcl2l11, Itgb8, Atf2                                                                                                           |
| mmu-miR-671-3p    | 2                        | Rbl2, Rps6kb2                                                                                                                                                      |
| mmu-miR-30b-3p    | 4                        | Rps6kb1, Chrm1, Prlr, Col5a2                                                                                                                                       |
| mmu-miR-741-3p    | 11                       | Fgf10, Creb3l2, Ywhag,, Fgf7 Ppp2r2a, Igf1, Phlpp2, Vegfa, Fgf13, Prkca, Lpar3                                                                                     |
| mmu-miR-27a-5p    | 1                        | Il2                                                                                                                                                                |
| mmu-miR-467b-3p   | 20                       | Mapk1, Pik3r1, Gsk3b, Itga2, Grb2, Ppp2r5c, Vegfa, Gng2, Ppp2ca, Osm, Gngt1, Fgf16, Itgb1, Col11a1, Bcl2l11, Pten, Met, Col5a1, Pkn2, Kit                          |
| mmu-miR-878-3p    | 2                        | Ywhag, Hsp90b1                                                                                                                                                     |
| mmu-miR-150-5p    | 8                        | Pik3r1, Gsk3b, Col1a1, Them4, Ghr, Osmr, Fgf2, Myb                                                                                                                 |
| mmu-miR-328-3p    | 4                        | Ywhaz, Csf1r, Itga5, Rptor                                                                                                                                         |
| mmu-miR-705       | 2                        | Tsc1, Col27a1                                                                                                                                                      |
| mmu-miR-99b-3p    | 1                        | Gsk3b                                                                                                                                                              |
| mmu-miR-425-5p    | 4                        | Map2k1, Igf1, Pik3ca, Pten                                                                                                                                         |
| mmu-miR-294-3p    | 14                       | Fgf10, Ppp2r2a, Creb1, Phlpp2, Cdkn1a, Rbl2, Atf6b, Fgf9, Crtc2, Mcl1, Pten, Itgb8, Col4a2, Pkn2                                                                   |
| mmu-miR-295-3p    | 13                       | Ppp2r2a, Creb1, Phlpp2, Cdkn1a, Rbl2, Atf6b, Fgf9, Crtc2, Mcl1, Pten, Itgb8, Col4a2, Pkn2                                                                          |
| mmu-miR-465a-3p   | 1                        | Pik3r1                                                                                                                                                             |
| mmu-miR-181a-5p   | 14                       | Mapk1, Pik3r3, Rps6kb1, Ywhag, Map2k1, Creb1, Sos1, Itgb1, Bcl2l11, Pdgfra, Akt3, Pten, Itgb8, Hsp90b1                                                             |
| mmu-miR-877-3p    | 3                        | Itgb3, Rptor, Lamb1                                                                                                                                                |
| mmu-let-7b-5p     | 20                       | Prkaa2, Tsl, Bcl2l1, Col3a1, Thbs1, Insr, Ngf, Col1a1, Col27a1, Chrm1, Prlr, Ghr, Nras, Col5a2, Osmr, Col24a1, Col1a2, Il6, Rps6kb2, Col4a2                        |
| mmu-let-7a-5p     | 20                       | Prkaa2, Tsc1, Bcl2l1, Col3a1, Thbs1, Insr, Ngf, Col1a1, Col27a1,, Chrm1 Prlr, Ghr, Nras, Col5a2, Osmr, Col24a1, Col1a2, Il6, Rps6kb2, Col4a2                       |
| mmu-miR-463-5p    | 1                        | Myb                                                                                                                                                                |
| mmu-miR-92a-3p    | 22                       | Prkaa2, Tsc1, Creb3l2, Ibsp, Pik3r3, Rps6kb1, Ddit4, Fasl, Col27a1, Phlpp2, Itga5, Sgk3, Prkaa1, Itga8, Pik3ca, Pik3cb, Itgav, Col1a2, Bcl2l11, Sgk1, Pten, Col5a1 |
| mmu-miR-877-5p    | 1                        | Itga8                                                                                                                                                              |
| mmu-miR-135a-1-3p | 2                        | Fgf15, Pten                                                                                                                                                        |
| mmu-miR-200a-3p   | 11                       | Prkaa2, Ywhag, Ccne2, Grb2, Phlpp2, Rheb, Gng5, Pdgfra, Eph2, Pten, Efnal                                                                                          |
| mmu-miR-181c-5p   | 13                       | Mapk1, Pik3r3, Rps6kb1, Ywhag, Map2k1, Creb1, Itgb1, Bcl2l11, Pdgfra, Akt3, Pten, Itgb8, Hsp90b1                                                                   |
| mmu-miR-883b-3p   | 6                        | Ywhag, Ywhab, Ppp2r5a, Itgb1, Pten, Atf2                                                                                                                           |
| mmu-miR-139-5p    | 9                        | Gnb1, Eif4b, Ppp2ca, Gnb4, Ywhaq, Gng5, Itgb8, Ppp2r5c, Col5a1                                                                                                     |
| mmu-miR-409-3p    | 5                        | G6pc, Igf1, Ywhab, Ppp2ca, Fgf9                                                                                                                                    |
| mmu-miR-200a-5p   | 4                        | Gnb1, Ppp2ca, Fgf13, Sgk1                                                                                                                                          |

\* Diana micro-T-CSD algorithm was used to predict the miRNA target Genes. Diana Mirpath software was used to identify significantly modulated KEGG pathways of the miRNA target genes. (34: Vlachos, I. S., N. Kostoulas, T. Vergoulis, G. Georgakilas, M. Reczko, M. Maragkakis, M. D. Paraskevopoulou, K. Prionidis, T. Dalamagas, and A. G. Hatzigeorgiou. 2012. DIANA miRPath v 2.0: investigating the combinatorial effect of microRNAs in pathways. Nucleic acids research 40:W498-504.)

**Supplementary Dataset 1**

**Modulated microRNA predicted gene targets in Jak-STAT signaling pathway\***

| MiRNA            | Number of Genes Targeted | Genes                                                            |
|------------------|--------------------------|------------------------------------------------------------------|
| mmu-miR-376c-3p  | 1                        | Spry2                                                            |
| mmu-miR-135b-5p  | 7                        | Clcf1, Pik3r2, Socs4, Prlr, Pik3cd, Myc, Stat6                   |
| mmu-miR-466b-3p  | 3                        | Il21, Pias1, Spred2                                              |
| mmu-miR-350-3p   | 8                        | Pik3r3, Spry4, Lifr, Il21, Ghr, Spred1, Sos1, Spry2              |
| mmu-miR-486-5p   | 1                        | Pik3r1                                                           |
| mmu-miR-214-3p   | 5                        | Cbl, Spry4, Il10rb, Socs7, Akt3                                  |
| mmu-miR-27b-5p   | 2                        | Sos2, Pik3cg                                                     |
| mmu-miR-7b-5p    | 3                        | Il2ra, Pias1, Pik3cd                                             |
| mmu-miR-29b-1-5p | 1                        | Stat4                                                            |
| mmu-miR-132-3p   | 3                        | Spry1, Spred1, Sos1                                              |
| mmu-miR-466a-3p  | 9                        | Pik3r1, Spry1, Il21, Spred1, Pias1, Spry2, Cntfr, Spred2, Pik3cd |
| mmu-miR-7a-1-3p  | 6                        | Pik3r1, Socs4, Sos1, Pias1, Pik3cb, Pias2                        |
| mmu-miR-381-3p   | 6                        | Spry1, Clcf1, Spred1, Pias1, Spry2, Socs5                        |
| mmu-miR-22-5p    | 4                        | Il2ra, Lepr, Socs7, Socs5                                        |
| mmu-let-7f-5p    | 6                        | Bcl2l1, Prlr, Ghr, Il10, Osmr, Il6                               |
| mmu-miR-375-3p   | 3                        | Prlr, Pik3ca, Socs5                                              |
| mmu-miR-351-5p   | 1                        | Il7r                                                             |
| mmu-miR-193b-3p  | 1                        | Sos2                                                             |
| mmu-miR-18a-3p   | 2                        | Cblb, Stat3                                                      |
| mmu-miR-191-3p   | 1                        | Bcl2l1                                                           |
| mmu-miR-17-3p    | 2                        | Socs7, Spred2                                                    |
| mmu-miR-30b-3p   | 1                        | Prlr                                                             |
| mmu-miR-741-3p   | 2                        | Il12rb2, Csf2rb2                                                 |
| mmu-miR-27a-5p   | 1                        | Il2                                                              |
| mmu-miR-467b-3p  | 8                        | Pik3r1, Spry1, Grb2, Spred1, Pias1, Osm, Spry2, Cntfr            |
| mmu-miR-878-3p   | 1                        | Lifr                                                             |
| mmu-miR-150-5p   | 4                        | Pik3r1, Stat5b, Ghr, Osmr                                        |
| mmu-miR-425-5p   | 2                        | Lifr, Pik3ca                                                     |
| mmu-miR-294-3p   | 2                        | Irf9, Il28ra                                                     |
| mmu-miR-295-3p   | 2                        | Irf9, Il28ra                                                     |
| mmu-miR-582-3p   | 1                        | Spred1                                                           |
| mmu-miR-465a-3p  | 1                        | Pik3r1                                                           |
| mmu-miR-181a-5p  | 6                        | Pik3r3, Cblb, Lif, Spry4, Sos1, Akt3                             |
| mmu-miR-877-3p   | 3                        | Socs2, Tpo, Il13ra1                                              |
| mmu-let-7b-5p    | 8                        | Bcl2l1, Il13, Cish, Prlr, Ghr, Il10, Osmr, Il6                   |
| mmu-let-7a-5p    | 8                        | Bcl2l1, Il13, Cish, Prlr, Ghr, Il10, Osmr, Il6                   |
| mmu-miR-92a-3p   | 3                        | Pik3r3, Pik3ca, Pik3cb                                           |
| mmu-miR-200a-3p  | 4                        | Stat5b, Spry4, Stat5a, Grb2                                      |
| mmu-miR-181c-5p  | 6                        | Pik3r3, Cblb, Lif, Spry4, Spred1, Akt3                           |
| mmu-miR-883b-3p  | 3                        | Cblb, Lif, Socs5                                                 |
| mmu-miR-139-5p   | 1                        | Socs7                                                            |

\* Diana micro-T-CSD algorithm was used to predict the miRNA target Genes. Diana Mirpath software was used to identify significantly modulated KEGG pathways of the miRNA target genes. (34: Vlachos, I. S., N. Kostoulas, T. Vergoulis, G. Georgakilas, M. Reczko, M. Maragkakis, M. D. Paraskevopoulou, K. Prionidis, T. Dalamagas, and A. G. Hatzigeorgiou. 2012. DIANA miRPath v.2.0: investigating the combinatorial effect of microRNAs in pathways. Nucleic acids research 40:W498-504.)

## Supplementary Dataset 1

## Modulated microRNA predicted gene targets in MAPK signaling pathway\*

| MiRNA             | Number of Genes Targeted | Genes                                                                                                                                     |
|-------------------|--------------------------|-------------------------------------------------------------------------------------------------------------------------------------------|
| mmu-miR-28-3p     | 2                        | Fos, Cacna1g                                                                                                                              |
| mmu-miR-30c-1-3p  | 4                        | Map3k3, Il1r1, Map4k1, Ptprr                                                                                                              |
| mmu-miR-376c-3p   | 7                        | Rasa2, Mef2c, Bdnf, Rapgef2, Cacna1g, Cacna2d1, Map3k8                                                                                    |
| mmu-miR-135b-5p   | 6                        | Mef2c, Rps6ka5, Fgf1, Ntrk2, Cacna1d, Myc                                                                                                 |
| mmu-miR-466b-3p   | 13                       | Mapk, Rasa2, Mef2c, Jun, Max, Cacna1b, Taok1, Map3k4, Nlk, Il1a, Fgfr2, Pdgfra, Ptprr                                                     |
| mmu-miR-350-3p    | 15                       | Rasgrp1, Stmn1, Bdnf, Map2k3, Cacnb4, Ppm1b, Map2k4, Cacna2d1, Mecom, Sos1, Dusp10, Stk4, Ppp3r1, Ikbkg, Pdgfra                           |
| mmu-miR-149-5p    | 4                        | Rap1a, Fasl, Flna, Pdgfra                                                                                                                 |
| mmu-miR-486-5p    | 4                        | Nf1, Ptpn7, Stk4, Map3k7                                                                                                                  |
| mmu-miR-214-3p    | 18                       | Mef2c, Fgf14, Ikbkb, Hspb1, Fgf20, Ppm1a, Cacnb1, Fgfr1, Cacna2d1, Nras, Rasa1, Ntkb1, Fgf3, Flna, Akt3, Pak2, Nfatc2, Mapk8              |
| mmu-miR-27b-5p    | 1                        | Sos2                                                                                                                                      |
| mmu-miR-93-3p     | 4                        | Mapk1, Ntrk2, Flna, Rps6ka2                                                                                                               |
| mmu-miR-467c-5p   | 2                        | Taok3, Cdc25b                                                                                                                             |
| mmu-miR-7b-5p     | 4                        | Braf, Mecom, Cacng7, Arrb1                                                                                                                |
| mmu-miR-132-3p    | 10                       | Mapk1, Cacnb4, Nlk, Dusp9, Rasgrp3, Sos1, Cacng2, Rras2, Mapkapk2, Cacna1c                                                                |
| mmu-miR-466a-3p   | 18                       | Rasgrp1, Mapk1, Rasa2, Mef2c, Bdnf, Cacna1b, Fgf4, Taok1, Rps6ka3, Ntrk2, Cacna1g, Chuk, Dusp10, Fgfr2, Pdgfra, Ptprr, Cdc42, Tab2        |
| mmu-miR-7a-1-3p   | 18                       | Bdnf, Cacnb4, Rapgef2, Ntrk2, Ppp3cb, Prkx, Fgf13, Kras, Sos1, Rap1b, Rras2, Dusp10, Map3k5, Ppp3r1, Ppp3ca, Pdgfra, Cdc42, B230120H23Rik |
| mmu-miR-381-3p    | 17                       | Mef2c, Bdnf, Taok1, Rps6ka3, Ntrk2, Nf1, Fgf13, Cacna2d1, Rap1b, Rras2, Crk, 1500003O03Rik, Fgfr2, Ppp3ca, Cacna1c, Atf2, Cdc42           |
| mmu-miR-15b-3p    | 1                        | Mecom                                                                                                                                     |
| mmu-miR-22-5p     | 6                        | Tgfb2, Rap1a, Map2k1, Cacng2, Rap1b, Elk1                                                                                                 |
| mmu-let-7f-5p     | 11                       | Map4k3, Map4k4, Ngf, Fgf11, Tgfb1, Nras, Map4k2, Dusp4, Flna, Dusp1, Mapk8                                                                |
| mmu-miR-423-5p    | 1                        | Mras                                                                                                                                      |
| mmu-miR-375-3p    | 5                        | Bdnf, Cacna2d1, Cacng2, Map3k5, Cacna1a                                                                                                   |
| mmu-miR-351-5p    | 9                        | Mapk12, Rap1a, Rps6ka1, Cacnb1, Dusp7, Map2k7, Map4k2, Traf6, Map3k11                                                                     |
| mmu-miR-193b-3p   | 5                        | Sos2, Max, Fgf1, Rapgef2, Dusp7                                                                                                           |
| mmu-miR-331-3p    | 1                        | Cacnb1                                                                                                                                    |
| mmu-miR-18a-3p    | 1                        | Mapt                                                                                                                                      |
| mmu-miR-191-3p    | 3                        | Fos, Rapgef2, Nlk                                                                                                                         |
| mmu-miR-17-3p     | 2                        | Map4k2, Atf2                                                                                                                              |
| mmu-miR-296-5p    | 1                        | Srf                                                                                                                                       |
| mmu-miR-30b-3p    | 2                        | Cacna2d1, Map3k8                                                                                                                          |
| mmu-miR-741-3p    | 12                       | Fgf10, Taok3, Fgf7, Cacnb4, Ntrk2, Ntf5, Mapk10, Fgf13, Prkca, Pla2g4c, Ptprr, Rps6ka2                                                    |
| mmu-miR-27a-5p    | 2                        | Cacna2d1, Mecom                                                                                                                           |
| mmu-miR-467b-3p   | 17                       | Rasgrp1, Mapk1, Rasa2, Mef2c, Bdnf, Cacna1b, Taok1, Rps6ka3, Grb2, Ntrk2, Cacna1g, Cacna2d1, Rap1b, Dusp10, Fgf16, Ptprr, Tab2            |
| mmu-miR-878-3p    | 1                        | Mef2c                                                                                                                                     |
| mmu-miR-150-5p    | 4                        | Ppp3r2, Cacna1g, Fgfr2, Srf                                                                                                               |
| mmu-miR-328-3p    | 3                        | Max, Cacng2, Flna                                                                                                                         |
| mmu-miR-705       | 3                        | Prkcg, Map3k13, Dusp8                                                                                                                     |
| mmu-miR-425-5p    | 2                        | Bdnf, Map2k1                                                                                                                              |
| mmu-miR-294-3p    | 11                       | Fgf10, Mef2c, Rps6ka5, Rps6ka1, Mknk2, Dusp2, Tgfb2, Elk4, Fgf9, Ppp3r1, Map3k11                                                          |
| mmu-miR-295-3p    | 13                       | Mef2c, Rps6ka5, Map3k12, Rps6ka1, Mknk2, Dusp2, Rps6ka3, Tgfb2, Crk, Elk4, Fgf9, Ppp3r1, Map3k11                                          |
| mmu-miR-582-3p    | 1                        | Rps6ka3                                                                                                                                   |
| mmu-miR-181a-5p   | 16                       | Mapk1, Map2k1, Taok1, Fos, Rps6ka3, Nlk, Tgfb1, Il1a, Braf, Sos1, Rap1b, Rras2, Tnf, Ppp3r1, Pdgfra, Akt3                                 |
| mmu-let-7b-5p     | 11                       | Mef2c, Map4k3, Map4k4, Ngf, Tgfb1, Nras, Dusp4, Flna, Tab2, Dusp1, Mapk8                                                                  |
| mmu-let-7a-5p     | 10                       | Map4k3, Map4k4, Ngf, Tgfb1, Nras, Map4k2, Dusp4, Flna, Dusp1, Mapk8                                                                       |
| mmu-miR-92a-3p    | 9                        | Fasl, Nlk, Map2k4, Braf, Rap1b, Dusp10, Elk4, Cacna1c, B230120H23Rik                                                                      |
| mmu-miR-135a-1-3p | 1                        | Fgf15                                                                                                                                     |
| mmu-miR-200a-3p   | 13                       | Tgfb2, Map3k3, Grb2, Rapgef2, Ntrk2, Map2k4, Cacna2d1, Dusp3, Pdgfra, Prkach, Map3k7, Cdc42, Mapk8                                        |
| mmu-miR-181c-5p   | 15                       | Mapk1, Map2k1, Taok1, Fos, Rps6ka3, Nlk, Tgfb1, Il1a, Braf, Rap1b, Rras2, Tnf, Ppp3r1, Pdgfra, Akt3                                       |
| mmu-miR-883b-3p   | 2                        | Nf1, Atf2                                                                                                                                 |
| mmu-miR-139-5p    | 6                        | Jun, Taok1, Prkx, Cacna2d1, Rap1b, Mapk8                                                                                                  |
| mmu-miR-409-3p    | 2                        | Bdnf, Fgf9                                                                                                                                |
| mmu-miR-200a-5p   | 4                        | Ppm1a, Nr4a1, Fgf13, Map3k7                                                                                                               |

\*Diana micro-T-CSD algorithm was used to predict the miRNA target Genes. Diana Mirpath software was used to identify significantly modulated KEGG pathways of the miRNA target genes. (34: Vlachos, I. S., N. Kostoulas, T. Vergoulis, G. Georgakilas, M. Reczko, M. Maragkakis, M. D. Paraskevopoulou, K. Pionidis, T. Dalamagas, and A. G. Hatzigeorgiou. 2012. DIANA miPath v.2.0: investigating the combinatorial effect of microRNAs in pathways. Nucleic acids research 40:W498-504.)

## Supplementary Dataset 1

| Modulated microRNA predicted gene targets in mTOR signaling pathway* |                          |                                                                          |
|----------------------------------------------------------------------|--------------------------|--------------------------------------------------------------------------|
| MiRNA                                                                | Number of Genes Targeted | Genes                                                                    |
| mmu-miR-376c-3p                                                      | 1                        | Hif1a                                                                    |
| mmu-miR-135b-5p                                                      | 3                        | Pik3r2, Hif1a, Pik3cd                                                    |
| mmu-miR-466b-3p                                                      | 6                        | Mapk1, Pdpk1, Igf1, Irs1, Vegfa, Cab39                                   |
| mmu-miR-350-3p                                                       | 3                        | Prkaa2, Pik3r3, Rictor                                                   |
| mmu-miR-486-5p                                                       | 3                        | Pik3r1, Pdpk1, Pten                                                      |
| mmu-miR-214-3p                                                       | 5                        | Pdpk1, Ikbkb, Pgf, Akt3, Cab39                                           |
| mmu-miR-27b-5p                                                       | 1                        | Pik3cg                                                                   |
| mmu-miR-93-3p                                                        | 3                        | Mapk1, Hif1a, Rps6ka2                                                    |
| mmu-miR-7b-5p                                                        | 4                        | Rps6kb1, Ddit4, Braf, Pik3cd                                             |
| mmu-miR-132-3p                                                       | 2                        | Mapk1, Pten                                                              |
| mmu-miR-466a-3p                                                      | 10                       | Mapk1, Pik3r1, Pdpk1, Rps6ka3, Irs1, Vegfa, Prkaa1, Pten, Pik3cd, Cab39  |
| mmu-miR-7a-1-3p                                                      | 6                        | Pik3r1, Igf1, Hif1a, Rictor, Pik3cb, Pten                                |
| mmu-miR-381-3p                                                       | 9                        | Pdpk1, Rps6kb1, Ulk2, Rps6ka3, Vegfa, Rictor, Rragc, Pten, Cab39         |
| mmu-miR-15b-3p                                                       | 1                        | Hif1a                                                                    |
| mmu-miR-22-5p                                                        | 1                        | Strada                                                                   |
| mmu-let-7f-5p                                                        | 4                        | Prkaa2, Tsc1, Rictor, Rps6kb2                                            |
| mmu-miR-375-3p                                                       | 3                        | Tsc1, Pdpk1, Pik3ca                                                      |
| mmu-miR-351-5p                                                       | 4                        | Prkaa2, Ulk3, Rps6ka1, Strada                                            |
| mmu-miR-193b-3p                                                      | 1                        | Pten                                                                     |
| mmu-miR-17-3p                                                        | 2                        | Tsc1, Eif4e2                                                             |
| mmu-miR-671-3p                                                       | 1                        | Rps6kb2                                                                  |
| mmu-miR-30b-3p                                                       | 1                        | Rps6kb1                                                                  |
| mmu-miR-741-3p                                                       | 5                        | Igf1, Vegfa, Prkca, Strada, Rps6ka2                                      |
| mmu-miR-467b-3p                                                      | 7                        | Mapk1, Pik3r1, Ulk2, Rps6ka3, Vegfa, Pten, Cab39                         |
| mmu-miR-878-3p                                                       | 1                        | Hif1a                                                                    |
| mmu-miR-150-5p                                                       | 2                        | Pik3r1, Ulk3                                                             |
| mmu-miR-328-3p                                                       | 2                        | Rragc, Rptor                                                             |
| mmu-miR-705                                                          | 2                        | Tsc1, Prkcg                                                              |
| mmu-miR-425-5p                                                       | 3                        | Igf1, Pik3ca, Pten                                                       |
| mmu-miR-294-3p                                                       | 2                        | Rps6ka1, Pten                                                            |
| mmu-miR-295-3p                                                       | 3                        | Rps6ka1, Rps6ka3, Pten                                                   |
| mmu-miR-582-3p                                                       | 1                        | Rps6ka3                                                                  |
| mmu-miR-465a-3p                                                      | 1                        | Pik3r1                                                                   |
| mmu-miR-181a-5p                                                      | 8                        | Mapk1, Pik3r3, Rps6kb1, Rps6ka3, Braf, Tnf, Akt3, Pten                   |
| mmu-miR-877-3p                                                       | 1                        | Rptor                                                                    |
| mmu-let-7b-5p                                                        | 4                        | Prkaa2, Tsc1, Rictor, Rps6kb2                                            |
| mmu-let-7a-5p                                                        | 4                        | Prkaa2, Tsc1, Rictor, Rps6kb2                                            |
| mmu-miR-92a-3p                                                       | 10                       | Prkaa2, Tsc1, Pik3r3, Rps6kb1, Ddit4, Braf, Prkaa1, Pik3ca, Pik3cb, Pten |
| mmu-miR-135a-1-3p                                                    | 1                        | Pten                                                                     |
| mmu-miR-200a-3p                                                      | 5                        | Prkaa2, Ulk2, Rheb, Cab39l, Pten                                         |
| mmu-miR-181c-5p                                                      | 8                        | Mapk1, Pik3r3, Rps6kb1, Rps6ka3, Braf, Tnf, Akt3, Pten                   |
| mmu-miR-883b-3p                                                      | 2                        | Rictor, Pten                                                             |
| mmu-miR-139-5p                                                       | 1                        | Eif4b                                                                    |
| mmu-miR-409-3p                                                       | 1                        | Igf1                                                                     |

\* Diana micro-T-CSD algorithm was used to predict the miRNA target Genes. Diana Mirpath software was used to identify significantly modulated KEGG pathways of the miRNA target genes. (34: Vlachos, I. S., N. Kostoulas, T. Vergoulis, G. Georgakilas, M. Reczko, M. Maragkakis, M. D. Paraskevopoulou, K. Prionidis, T. Dalamagas, and A. G. Hatzigeorgiou. 2012. DIANA miRPath v.2.0: investigating the combinatorial effect of microRNAs in pathways. Nucleic acids research 40:W498-504.)

## Supplementary Dataset 1

| Modulated microRNA predicted gene targets in NF-kappa B signaling pathway* |                          |                                        |
|----------------------------------------------------------------------------|--------------------------|----------------------------------------|
| MiRNA                                                                      | Number of Genes Targeted | Genes                                  |
| mmu-miR-30c-1-3p                                                           | 2                        | Il1r1, Cxcl12                          |
| mmu-miR-135b-5p                                                            | 2                        | Cd40lg, Tab3                           |
| mmu-miR-466b-3p                                                            | 4                        | Tlr4, Xiap, Vcam1, Cxcl2               |
| mmu-miR-350-3p                                                             | 6                        | Malt1, Ptgs2, Xiap, Tab3, Ikbkg, Birc2 |
| mmu-miR-149-5p                                                             | 1                        | Tirap                                  |
| mmu-miR-486-5p                                                             | 2                        | Irak4, Map3k7                          |
| mmu-miR-214-3p                                                             | 5                        | Ikbkb, Prkcq, Nfkb1, Traf3, Ripk1      |
| mmu-miR-93-3p                                                              | 1                        | Plcg1                                  |
| mmu-miR-7b-5p                                                              | 3                        | Tnfaip3, Tirap, Parp1                  |
| mmu-miR-466a-3p                                                            | 6                        | Nfkbia, Malt1, Birc3, Xiap, Chuk, Tab2 |
| mmu-miR-7a-1-3p                                                            | 1                        | Xiap                                   |
| mmu-miR-381-3p                                                             | 2                        | Nfkbia, Csnk2a1                        |
| mmu-miR-22-5p                                                              | 2                        | Plcg1, Erc1                            |
| mmu-let-7f-5p                                                              | 1                        | Bcl2l1                                 |
| mmu-miR-423-5p                                                             | 1                        | Ccl4                                   |
| mmu-miR-351-5p                                                             | 3                        | Tnfaip3, Csnk2a1, Traf6                |
| mmu-miR-193b-3p                                                            | 1                        | Plau                                   |
| mmu-miR-191-3p                                                             | 1                        | Bcl2l1                                 |
| mmu-miR-30b-3p                                                             | 2                        | Malt1, Ticam1                          |
| mmu-miR-741-3p                                                             | 2                        | Tnfrsf11a, Traf3                       |
| mmu-miR-467b-3p                                                            | 4                        | Nfkbia, Malt1, Birc3, Tab2             |
| mmu-miR-705                                                                | 1                        | Csnk2a2                                |
| mmu-miR-181a-5p                                                            | 4                        | Xiap, Card11, Tab3, Tnf                |
| mmu-let-7b-5p                                                              | 3                        | Bcl2l1, Csnk2a1, Tab2                  |
| mmu-let-7a-5p                                                              | 2                        | Bcl2l1, Csnk2a1                        |
| mmu-miR-92a-3p                                                             | 1                        | Traf3                                  |
| mmu-miR-200a-3p                                                            | 2                        | Cxcl12, Map3k7                         |
| mmu-miR-181c-5p                                                            | 4                        | Xiap, Card11, Tab3, Tnf                |
| mmu-miR-139-5p                                                             | 1                        | Traf3                                  |
| mmu-miR-200a-5p                                                            | 1                        | Map3k7                                 |

\* Diana micro-T-CSD algorithm was used to predict the miRNA target Genes. Diana Mirpath software was used to identify significantly modulated KEGG pathways of the miRNA target genes. (34: Vlachos, I. S., N. Kostoulas, T. Vergoulis, G. Georgakilas, M. Reczko, M. Maragkakis, M. D. Paraskevopoulou, K. Prionidis, T. Dalamagas, and A. G. Hatzigeorgiou. 2012. DIANA miRPath v.2.0: investigating the combinatorial effect of microRNAs in pathways. Nucleic acids research 40:W498-504.)

## Supplementary Dataset 1

| Modulated microRNA predicted gene targets in Toll-like receptor signaling pathway* |                       |                                                   |
|------------------------------------------------------------------------------------|-----------------------|---------------------------------------------------|
| MiRNA                                                                              | NumberofGenesTargeted | Genes                                             |
| mmu-miR-28-3p                                                                      | 1                     | Fos                                               |
| mmu-miR-376c-3p                                                                    | 1                     | Map3k8                                            |
| mmu-miR-135b-5p                                                                    | 2                     | Pik3r2, Pik3cd                                    |
| mmu-miR-466b-3p                                                                    | 5                     | Mapk1, Jun, Tlr4, Spp1, Cxcl10,                   |
| mmu-miR-350-3p                                                                     | 4                     | Pik3r3, Map2k3, Map2k4, Ikbkg                     |
| mmu-miR-149-5p                                                                     | 1                     | Tirap                                             |
| mmu-miR-486-5p                                                                     | 3                     | Pik3r1, Irak4, Map3k7                             |
| mmu-miR-214-3p                                                                     | 6                     | Ikbkb, Nfkb1, Traf3, Akt3, Ripk1, Mapk8           |
| mmu-miR-27b-5p                                                                     | 1                     | Pik3cg                                            |
| mmu-miR-93-3p                                                                      | 1                     | Mapk1                                             |
| mmu-miR-7b-5p                                                                      | 2                     | Tirap, Pik3cd                                     |
| mmu-miR-132-3p                                                                     | 1                     | Mapk1                                             |
| mmu-miR-466a-3p                                                                    | 7                     | Mapk1, Nfkb1a, Pik3r1, Cxcl10, Chuk, Pik3cd, Tab2 |
| mmu-miR-7a-1-3p                                                                    | 2                     | Pik3r1, Pik3cb                                    |
| mmu-miR-381-3p                                                                     | 2                     | Nfkb1a, Tlr3                                      |
| mmu-miR-22-5p                                                                      | 1                     | Map2k1                                            |
| mmu-let-7f-5p                                                                      | 2                     | Il6, Mapk8                                        |
| mmu-miR-423-5p                                                                     | 1                     | Ccl4                                              |
| mmu-miR-375-3p                                                                     | 1                     | Pik3ca                                            |
| mmu-miR-351-5p                                                                     | 3                     | Mapk12, Map2k7, Traf6                             |
| mmu-miR-191-3p                                                                     | 1                     | Fos                                               |
| mmu-miR-30b-3p                                                                     | 2                     | Map3k8, Ticam1                                    |
| mmu-miR-741-3p                                                                     | 2                     | Mapk10, Traf3                                     |
| mmu-miR-467b-3p                                                                    | 4                     | Mapk1, Nfkb1a, Pik3r1, Tab2                       |
| mmu-miR-150-5p                                                                     | 1                     | Pik3r1                                            |
| mmu-miR-425-5p                                                                     | 2                     | Map2k1, Pik3ca                                    |
| mmu-miR-582-3p                                                                     | 1                     | Tollip                                            |
| mmu-miR-465a-3p                                                                    | 1                     | Pik3r1                                            |
| mmu-miR-181a-5p                                                                    | 6                     | Mapk1, Pik3r3, Map2k1, Fos, Tnf, Akt3             |
| mmu-let-7b-5p                                                                      | 3                     | Il6, Tab2, Mapk8                                  |
| mmu-let-7a-5p                                                                      | 2                     | Il6, Mapk8                                        |
| mmu-miR-92a-3p                                                                     | 5                     | Pik3r3, Map2k4, Pik3ca, Pik3cb, Traf3             |
| mmu-miR-200a-3p                                                                    | 3                     | Map2k4, Map3k7, Mapk8                             |
| mmu-miR-181c-5p                                                                    | 6                     | Mapk1, Pik3r3, Map2k1, Fos, Tnf, Akt3             |
| mmu-miR-139-5p                                                                     | 3                     | Jun, Traf3, Mapk8                                 |
| mmu-miR-200a-5p                                                                    | 1                     | Map3k7                                            |

\* Diana micro-T-CSD algorithm was used to predict the miRNA target Genes. Diana Mirpath software was used to identify significantly modulated KEGG pathways of the miRNA target genes. (34: Vlachos, I. S., N. Kostoulas, T. Vergoulis, G. Georgakilas, M. Reczko, M. Maragkakis, M. D. Paraskevopoulou, K. Prionidis, T. Dalamagas, and A. G. Hatzigeorgiou. 2012. DIANA miRPath v.2.0: investigating the combinatorial effect of microRNAs in pathways. Nucleic acids research 40:W498-504.)
